# Supplementary material
Source: publisher figshare collection journal article supplement (https://tandf.figshare.com/articles/dataset/_/6585188)
Supplement: Supplementary file 1 [file 1]

Archive with 10 entries (10 files):
- idre_a_1473508_sm8331.pdf
- idre_a_1473508_sm8330.pdf
- idre_a_1473508_sm8329.pdf
- idre_a_1473508_sm8328.pdf
- idre_a_1473508_sm8327.pdf
- idre_a_1473508_sm8326.pdf
- idre_a_1473508_sm8325.pdf
- idre_a_1473508_sm8324.pdf
- idre_a_1473508_sm8323.pdf
- idre_a_1473508_sm8322.pdf
