# Supplementary material
Source: publisher figshare collection journal article supplement (https://tandf.figshare.com/articles/dataset/_/6585188)
Supplement: Supplementary file 1 [file 1 › idre_a_1473508_sm8322.pdf]

**Supplementary table S1: Search Strategy:** The different keywords in their columns were combined with ‘or,’ and then the search string for each column was combined with ‘and’. All the keywords were linked to subject headings where appropriate.

| POPULATION                            | PHENOMENA OF INTEREST                                             | CONTEXT                                                                            |
|---------------------------------------|-------------------------------------------------------------------|------------------------------------------------------------------------------------|
| Nervous system disease*               | Quality of Life                                                   | Community Health*                                                                  |
| Central nervous system disease*       | Patient Satisfaction                                              | Community neuro – rehabilitation/                                                  |
| Parkinson* Disease                    | Client satisfaction                                               | neurological rehabilitation/ neurorehabilitation                                   |
| Parkinson* Disorders                  | Service user satisfaction                                         | /neuro rehabilitation                                                              |
| Parkinson* Disease, post encephalitic | Consumer satisfaction                                             | Community rehabilitation                                                           |
| Demyelinating auto immune Disease     | Health and Well being                                             | Community health cent*                                                             |
| Demyelinating disease*                | Patient/s view*/                                                  | Community support                                                                  |
| Multiple Sclerosis                    | experience*/perception*/perspective*/expectation*                 | Community medicine                                                                 |
| Multiple Sclerosis, Chronic           | Client/s view*/ experience*/perception*/perspective*/expectation* | Community Network*                                                                 |
| Progressive                           | Service user                                                      | Community Health nursing                                                           |
| Multiple Sclerosis, Relapsing         | view*/experience*/perception*/perspective*/expectation*           | Community Mental Health                                                            |
| Remitting                             | Userview*/experience*/perception*/perspective*/expectation*       | Community Pharmacy                                                                 |
| Multiple Sclerosis, secondary         | Patient reported outcome*                                         | Community therapy                                                                  |
| progressive                           | Patient reported experience*                                      | Community Physiotherapy                                                            |
| Multiple Sclerosis, primary           | Health and life quality                                           | Community Occupational Therapy                                                     |
| progressive                           | Wellness                                                          | Community Speech Therapy                                                           |
| Autoimmune Disease* of the Nervous    | Well being                                                        | Community therapy                                                                  |
| System                                | Life satisfaction                                                 | Community special service*                                                         |
| Neurodegenerative disease*            | Health and Life Quality                                           | Therapeutic community                                                              |
| Neuromuscular disease*                | Life Quality                                                      | Outreach service*                                                                  |
| Brain Injur*                          | Quality of service*                                               | Outpatient clinic*                                                                 |
| Brain disease*                        | Quality of care                                                   | Home care service*                                                                 |
| Chronic Head injur*                   | Quality indicators, healthcare                                    | Home Health Care/ Home Healthcare                                                  |
| Head injuries, penetrating            | Outcome assessment                                                | Home care agencies                                                                 |
| Head injuries, closed                 | Outcome                                                           | Home nursing                                                                       |
| Traumatic brain injur*                | Impact                                                            | Occupational therap*                                                               |
| Trauma, nervous system                |                                                                   | Physiotherap*                                                                      |
| Acquired Brain Injur*                 |                                                                   | Psycholog*                                                                         |
| Craniocerebral trauma                 |                                                                   | Speech Therap*                                                                     |
| Cerebral hemorrhage#, traumatic       |                                                                   | Mental health                                                                      |
| Brain stem hemorrhage#                |                                                                   | Occupational Health                                                                |
| Brain hemorrhage                      |                                                                   | Nursing Care                                                                       |
| Dystoni*                              |                                                                   | Public health nursing                                                              |
| Dystonic disorders                    |                                                                   | Rehabilitation                                                                     |
| Movement disorder*                    |                                                                   | Rehabilitation cent*                                                               |
| Long term neurological condition*     |                                                                   | Rehabilitation, Nursing                                                            |
| Progressive neurological condition*   |                                                                   | Rehabilitation, Vocational                                                         |
| Multiple Sclerosis Patient*           |                                                                   | Rehabilitation counsellors                                                         |
| Parkinson Disease Patient*            |                                                                   | Allied health occupation*                                                          |
| Dystonia Patient*                     |                                                                   | Day rehabilitation                                                                 |
| Patients with Acquired Brain Injur*   |                                                                   | Outreach rehabilitation                                                            |
| Neurologically Disabled               |                                                                   | Home rehabilitation                                                                |
| Neurologic manifestations             |                                                                   | Neuropsychological rehabilitation                                                  |
| Disabled person                       |                                                                   | Psychosocial rehab                                                                 |
|                                       |                                                                   | Psychological service*/support                                                     |
|                                       |                                                                   | Occupational rehabilitation/health services                                        |
|                                       |                                                                   | Specialist rehabilitation                                                          |
|                                       |                                                                   | Specialist neuro rehabilitation/neuro – rehabilitation/neurological rehabilitation |
|                                       |                                                                   | Health Care/ healthcare                                                            |
|                                       |                                                                   | Health care sector/facilities/ services                                            |
|                                       |                                                                   | Health personnel                                                                   |
|                                       |                                                                   | Delivery of Health Care                                                            |
|                                       |                                                                   | Health service*/facilities                                                         |
|                                       |                                                                   | Health facilities environment                                                      |
|                                       |                                                                   | Information Provision.                                                             |
|                                       |                                                                   | Preventative health care/ healthcare                                               |
|                                       |                                                                   | Preventative Health Service*                                                       |
|                                       |                                                                   | Primary Healthcare/ health care                                                    |
|                                       |                                                                   | Patient self determination                                                         |
|                                       |                                                                   | Health Promotion                                                                   |
|                                       |                                                                   | Health coaching                                                                    |
|                                       |                                                                   | Health education                                                                   |
|                                       |                                                                   | Health information                                                                 |
|                                       |                                                                   | Consumer health information                                                        |
|                                       |                                                                   | Access to health information                                                       |
|                                       |                                                                   | Hospital information systems                                                       |
|                                       |                                                                   | Clinical laboratory information                                                    |
|                                       |                                                                   | Drug information services                                                          |
|                                       |                                                                   | Information dissemination                                                          |
|                                       |                                                                   | Information cent*                                                                  |
|                                       |                                                                   | Self management program*                                                           |
|                                       |                                                                   | Managed Care program*                                                              |
|                                       |                                                                   | Medication therapy management                                                      |
|                                       |                                                                   | Disease management                                                                 |
|                                       |                                                                   | Disability management                                                              |
|                                       |                                                                   | Health services research                                                           |
|                                       |                                                                   | Counselling                                                                        |
|                                       |                                                                   | Vocational counsellors/support                                                     |
|                                       |                                                                   | Employment, supported                                                              |
|                                       |                                                                   | Training support                                                                   |
|                                       |                                                                   | Social support/ care/ services/ work*/ networks                                    |
|                                       |                                                                   | Personal health service*                                                           |
|                                       |                                                                   | Patient cent* care                                                                 |
|                                       |                                                                   | Client cent* care                                                                  |
|                                       |                                                                   | Self Care/ selfcare                                                                |
|                                       |                                                                   | Independent living programmes                                                      |
|                                       |                                                                   | Non directive therapy                                                              |
|                                       |                                                                   | Community assessment                                                               |
|                                       |                                                                   | Outcome assessment                                                                 |
