# Supplementary material
Source: publisher figshare collection journal article supplement (https://tandf.figshare.com/articles/dataset/_/6585188)
Supplement: Supplementary file 1 [file 1 › idre_a_1473508_sm8323.pdf]

**Supplementary table S2: Inclusion/exclusion criteria**

|                              | <b>INCLUSION CRITERIA</b>                                                                                                                                                                                                                                                                                                                                                                                                                                   | <b>EXCLUSION CRITERIA</b>                                                                                                                                                                                                                         |
|------------------------------|-------------------------------------------------------------------------------------------------------------------------------------------------------------------------------------------------------------------------------------------------------------------------------------------------------------------------------------------------------------------------------------------------------------------------------------------------------------|---------------------------------------------------------------------------------------------------------------------------------------------------------------------------------------------------------------------------------------------------|
| <b>POPULATION</b>            | Adults (male or female)<br>Age >18<br><br>Living with the following LTNC: Multiple Sclerosis, Parkinson's disease, Dystonia; Acquired Brain Injury (other than Stroke).<br>Using community rehabilitation and support services.                                                                                                                                                                                                                             | Any other progressive or non-progressive neurological condition including Stroke.<br>Carers<br>Children                                                                                                                                           |
| <b>PHENOMENA of INTEREST</b> | The actual experience of <i>using</i> community rehabilitation and support services<br><br>Generic or condition specific accounts/ experience measures.                                                                                                                                                                                                                                                                                                     | Experience of inpatient rehabilitation and/or treatment.<br>Carers' subjective experiences.<br>Professionals' subjective experiences.<br>Studies which exclusively focus on experiences of <i>living with</i> a long term neurological condition. |
| <b>CONTEXT</b>               | Community rehabilitation and support services as defined in Quality requirement 5 of the National Service Framework for Long Term Neurological Conditions [7].<br><ul style="list-style-type: none"> <li>Delivered in home</li> <li>Delivered in community</li> <li>Outpatient hospital services</li> </ul> Services which target issues associated with the activity and participation domains of the ICF [88].<br>Any geographical location in the world. | Services and Interventions which focus on the domain of impairment of the ICF [88].<br>Services received whilst the individual is not living in their home or in their place of residence.                                                        |
| <b>TYPES OF STUDIES</b>      | Qualitative Interpretative studies, including but not limited to designs such as phenomenology, grounded theory, ethnography, action research.<br>Descriptive qualitative studies or case studies that describe the experience of using community rehab and support services.<br>Studies published between 2005 and 2016 and limited to English language.<br>Studies which meet the Joanna Briggs Quality Standards [70].                                   | Quantitative studies<br>Mixed methods studies                                                                                                                                                                                                     |
