# Supplementary material
Source: publisher figshare collection journal article supplement (https://tandf.figshare.com/articles/dataset/_/6585188)
Supplement: Supplementary file 1 [file 1 › idre_a_1473508_sm8324.pdf]

**Supplementary table S3: Critical appraisal results for included studies using JBI-QARI critical appraisal tool [70] and ConQual tool [87]**

| QARI critical appraisal questions: | 1        | 2        | 3        | 4        | 5        | 6        | 7        | 8 | 9        | 10       | Total QARI 'yes' (ConQual score) |
|------------------------------------|----------|----------|----------|----------|----------|----------|----------|---|----------|----------|----------------------------------|
| Archer et al. [95]                 | U        | <b>N</b> | <b>N</b> | <b>Y</b> | Y        | <b>Y</b> | <b>Y</b> | Y | Y        | U        | 6 (3)                            |
| Armitage et al. [96]               | <b>N</b> | <b>Y</b> | <b>Y</b> | <b>U</b> | Y        | <b>Y</b> | <b>Y</b> | Y | <b>U</b> | Y        | 7 (4)                            |
| Boss & Finlayson. [97]             | Y        | <b>Y</b> | <b>Y</b> | <b>Y</b> | Y        | <b>U</b> | <b>Y</b> | Y | Y        | Y        | 9 (4)                            |
| Chamberlain. [98]                  | U        | <b>Y</b> | <b>Y</b> | <b>N</b> | <b>N</b> | <b>N</b> | <b>N</b> | Y | Y        | <b>N</b> | 4 (2)                            |
| Clarke & Coote. [99]               | Y        | <b>Y</b> | <b>Y</b> | <b>Y</b> | Y        | <b>U</b> | <b>Y</b> | Y | Y        | Y        | 9 (4)                            |
| das Nair et al. [100]              | Y        | <b>Y</b> | <b>Y</b> | <b>Y</b> | Y        | <b>N</b> | <b>Y</b> | Y | Y        | Y        | 9 (4)                            |
| Dodd et al. [101]                  | U        | <b>Y</b> | <b>Y</b> | <b>Y</b> | Y        | <b>Y</b> | <b>Y</b> | Y | Y        | Y        | 9 (5)                            |
| Doig et al. [102]                  | <b>N</b> | <b>Y</b> | <b>Y</b> | <b>Y</b> | Y        | <b>N</b> | <b>Y</b> | Y | Y        | Y        | 8 (4)                            |
| Embrey 2009. [103]                 | U        | <b>Y</b> | <b>Y</b> | <b>Y</b> | Y        | <b>U</b> | <b>U</b> | Y | Y        | Y        | 7 (3)                            |
| Embrey. 2009 [104]                 | U        | <b>Y</b> | <b>Y</b> | <b>Y</b> | Y        | <b>U</b> | <b>U</b> | Y | Y        | Y        | 7 (3)                            |
| Fitzpatrick et al. [105]           | Y        | <b>Y</b> | <b>Y</b> | <b>Y</b> | Y        | <b>Y</b> | <b>Y</b> | Y | <b>N</b> | Y        | 9 (5)                            |
| Fogg-Rogers et al. [106]           | U        | <b>Y</b> | <b>Y</b> | <b>Y</b> | Y        | <b>Y</b> | <b>Y</b> | Y | Y        | Y        | 9 (5)                            |
| Foster et al. [14]                 | U        | <b>Y</b> | <b>Y</b> | <b>U</b> | Y        | <b>U</b> | <b>Y</b> | Y | Y        | Y        | 7 (3)                            |
| Giles & Miyasaki. [107]            | Y        | <b>Y</b> | <b>Y</b> | <b>Y</b> | Y        | <b>Y</b> | <b>U</b> | Y | Y        | Y        | 9 (4)                            |
| Gilworth et al. [108]              | U        | <b>Y</b> | <b>Y</b> | <b>Y</b> | Y        | <b>N</b> | <b>N</b> | Y | Y        | Y        | 7 (3)                            |
| Hoosen et al. [83]                 | Y        | <b>N</b> | <b>Y</b> | <b>U</b> | Y        | <b>N</b> | <b>Y</b> | Y | Y        | Y        | 7 (2)                            |
| Jellie et al. [80]                 | Y        | <b>Y</b> | <b>Y</b> | <b>Y</b> | Y        | <b>Y</b> | <b>Y</b> | Y | Y        | Y        | 10 (5)                           |
| Keighley et al. [111]              | Y        | <b>Y</b> | <b>Y</b> | <b>Y</b> | Y        | <b>Y</b> | <b>N</b> | Y | Y        | Y        | 9 (4)                            |
| Kuipers et al. [90]                | <b>N</b> | <b>Y</b> | <b>U</b> | <b>U</b> | Y        | <b>N</b> | <b>N</b> | Y | Y        | Y        | 5 (1)                            |
| Lawson et al. [113]                | Y        | <b>Y</b> | <b>Y</b> | <b>Y</b> | Y        | <b>Y</b> | <b>Y</b> | Y | Y        | Y        | 10 (5)                           |
| Lefebvre, et al. [114]             | Y        | <b>Y</b> | <b>Y</b> | <b>Y</b> | Y        | <b>N</b> | <b>N</b> | Y | Y        | Y        | 8 (3)                            |
| Manssonn- Lexell [117]             | Y        | <b>Y</b> | <b>Y</b> | <b>Y</b> | Y        | <b>Y</b> | <b>Y</b> | Y | Y        | Y        | 10 (5)                           |
| Malcomson et al. [116]             | <b>N</b> | <b>U</b> | <b>Y</b> | <b>Y</b> | Y        | <b>N</b> | <b>N</b> | Y | Y        | Y        | 6 (2)                            |
| O'Brien et al. [121]               | Y        | <b>Y</b> | <b>Y</b> | <b>Y</b> | Y        | <b>Y</b> | <b>Y</b> | Y | Y        | Y        | 10 (5)                           |
| O'Brien et al. [122]               | Y        | <b>Y</b> | <b>Y</b> | <b>Y</b> | Y        | <b>Y</b> | <b>Y</b> | Y | Y        | Y        | 10 (5)                           |
| Parsons & Stanley [123]            | Y        | <b>Y</b> | <b>Y</b> | <b>Y</b> | Y        | <b>N</b> | <b>Y</b> | Y | Y        | Y        | 9 (4)                            |
| Pretzer-Aboff et al. [124]         | Y        | <b>Y</b> | <b>U</b> | <b>U</b> | Y        | <b>U</b> | <b>Y</b> | Y | Y        | Y        | 7 (1)                            |
| Salamonsen et al. [128]            | Y        | <b>Y</b> | <b>Y</b> | <b>Y</b> | Y        | <b>U</b> | <b>Y</b> | Y | Y        | Y        | 9 (4)                            |
| Sixsmith et al. [65]               | Y        | <b>Y</b> | <b>Y</b> | <b>Y</b> | Y        | <b>Y</b> | <b>Y</b> | Y | Y        | Y        | 10 (5)                           |
| Soeker et al. [82]                 | Y        | <b>Y</b> | <b>Y</b> | <b>Y</b> | Y        | <b>U</b> | <b>U</b> | Y | Y        | Y        | 8 (3)                            |
| Turner et al. [131]                | Y        | <b>Y</b> | <b>Y</b> | <b>Y</b> | Y        | <b>U</b> | <b>U</b> | Y | Y        | Y        | 8 (3)                            |
| Turner et al. [132]                | Y        | <b>Y</b> | <b>Y</b> | <b>Y</b> | Y        | <b>N</b> | <b>U</b> | Y | Y        | Y        | 8 (3)                            |
| Turner et al [133]                 | Y        | <b>Y</b> | <b>Y</b> | <b>Y</b> | Y        | <b>N</b> | <b>Y</b> | Y | Y        | Y        | 9 (4)                            |
| Twomey & Robinson, [134]           | Y        | <b>U</b> | <b>Y</b> | <b>Y</b> | Y        | <b>N</b> | <b>Y</b> | Y | Y        | Y        | 8 (3)                            |
| Van de Eijk et al. [75]            | Y        | <b>Y</b> | <b>Y</b> | <b>Y</b> | Y        | <b>N</b> | <b>Y</b> | Y | Y        | Y        | 9 (4)                            |
| Van Ruymbeke & Schneider. [137]    | Y        | <b>Y</b> | <b>Y</b> | <b>Y</b> | Y        | <b>U</b> | <b>Y</b> | Y | Y        | Y        | 9 (4)                            |
| Whitehead. [135]                   | <b>N</b> | <b>Y</b> | <b>Y</b> | <b>Y</b> | Y        | <b>Y</b> | <b>N</b> | Y | Y        | Y        | 8 (4)                            |

Y= yes; N=No; U=unclear. **Bold** = Questions used to determine ConQual score for dependability assessment.
