# Supplementary material
Source: publisher figshare collection journal article supplement (https://tandf.figshare.com/articles/dataset/_/6585188)
Supplement: Supplementary file 1 [file 1 › idre_a_1473508_sm8325.pdf]

**Supplementary table S4: ConQual: Assessment of Credibility and Dependability [87]**

| Synthesised Finding                                                                                                                                                                                                                                                                                                                                                                                                                                                                   | Type of research | Dependability        | Credibility | ConQual score | Comments                                                                                                                  |
|---------------------------------------------------------------------------------------------------------------------------------------------------------------------------------------------------------------------------------------------------------------------------------------------------------------------------------------------------------------------------------------------------------------------------------------------------------------------------------------|------------------|----------------------|-------------|---------------|---------------------------------------------------------------------------------------------------------------------------|
| SF1: People with MS, PD and ABI experience <i>interactions with some professionals/services which provide active participation, choice, confidence and autonomy in decision making.</i>                                                                                                                                                                                                                                                                                               | Qualitative      | High                 | High        | High          |                                                                                                                           |
| SF2: People with MS, PD and ABI experience <i>interactions with some health professionals which are disempowering and depersonalized, and do not accommodate individual preferences and needs.</i>                                                                                                                                                                                                                                                                                    | Qualitative      | High                 | High        | High          |                                                                                                                           |
| SF3 People with MS, PD and ABI perceive that a combination of <i>effective communication skills, specialist knowledge and an individualized approach to information provision is necessary</i> to reduce uncertainty, increase awareness and improve control for people using (or leaving) the service. Experiences of receiving adequate accessible, accurate information and education about the long term neurological condition and appropriate exercise/activity/support varied. | Qualitative      | *High                | High        | High          | *6 of 28 primary findings credible rather than unequivocal but not downgraded due to large number of unequivocal findings |
| SF4 <i>Indicators of success/outcomes/goals from community rehab and support services vary and may not be clear</i> to people with ABI and MS. The potential for 'goals' to provide structure, motivation and satisfaction is noted.                                                                                                                                                                                                                                                  | Qualitative      | High                 | High        | High          |                                                                                                                           |
| SF5 People with MS, PD and ABI value <i>opportunities for peer support and social interaction with peers</i> (people with similar long term neurological condition). These experiences may result in friendships, a feeling of collectivism, and encouragement for self-efficacy and self-management.                                                                                                                                                                                 | Qualitative      | High                 | High        | High          |                                                                                                                           |
| SF6 People with ABI and MS <i>value informal support (physical, emotional, administrative) from family and friends</i> , and perceive that the role of informal support could be maximized with appropriate assistance from community rehabilitation and support services.                                                                                                                                                                                                            | Qualitative      | *Downgrade one level | High        | Medium        | *Downgraded due to dependability of 3 of 5 studies                                                                        |
| SF7 People with ABI and MS consider that a <i>coordinated approach</i> between Community Rehabilitation and Support services <i>is required to ensure continuity during transition to the community, and case management services may fulfil this role.</i> Limited access to formal community rehabilitation and support services is experienced, for some people.                                                                                                                   | Qualitative      | *Downgrade one level | High        | Medium        | *Downgraded due to dependability of 13 of 15 studies.                                                                     |

**Dependability** of synthesised findings is indicated by the score for 'YES' answers to questions 2, 3,4, 6 and 7 [Box 2] (nb .If a number of studies score below 4 due to 'No' answers for Q2,3,4 of Conqual they are downgraded) [87].

**Credibility** (the confidence that can be placed in the interpretive analysis) is indicated by whether findings were unequivocal or credible [87]
