# Supplementary material
Source: publisher figshare collection journal article supplement (https://tandf.figshare.com/articles/dataset/_/6585188)
Supplement: Supplementary file 1 [file 1 › idre_a_1473508_sm8328.pdf]

**Supplementary table S7: Meta-aggregation process for ‘synthesised finding’ 4 (8 findings which formed 2 categories).**

| Findings<br>U = Unequivocal      C= Credible                                                                                                                                                                                                                                                                                                                                                                                                                          | Categories                                                                                                                         | Synthesised Finding’ (SF)                                                                                                                                                                                                                          |
|-----------------------------------------------------------------------------------------------------------------------------------------------------------------------------------------------------------------------------------------------------------------------------------------------------------------------------------------------------------------------------------------------------------------------------------------------------------------------|------------------------------------------------------------------------------------------------------------------------------------|----------------------------------------------------------------------------------------------------------------------------------------------------------------------------------------------------------------------------------------------------|
| <i>Goals provide structure for rehabilitation ABI [102] U</i><br><i>Motivational aspects of goals ABI [102] U</i><br><i>Support for developing realistic goals for return to work rehabilitation valued (Hoosen et al 2013) Brain Injury U</i><br><i>Importance of Goal ownership. ABI [83] U</i><br><i>Satisfaction derived from the use of goals ABI [102] U</i>                                                                                                    | <div> <p>The potential of goals to provide structure, motivation and satisfaction within rehabilitation was recognized.</p> </div> | <div> <p>SF4: Indicators of success/outcomes/goals from Community Rehab and Support services vary and may not be clear to people with ABI and MS. The potential for ‘goals’ to provide structure, motivation and satisfaction is noted.</p> </div> |
| <i>Indicators of success for participants included physical changes (including increased strength, increased appetite, increased fitness, decreased fatigue, decreased stiffness, decreased hyperkinetic movement) and increased function MS [121] U</i><br><i>Participants confused about what was meant by the term goals with many not feeling they had specific goals they were working towards. ABI [132] U</i><br><i>Challenges of goal setting ABI [102] U</i> | <div> <p>Variations and lack of clarity regarding indicators of success and goals was experienced.</p> </div>                      |                                                                                                                                                                                                                                                    |
