# Supplementary material
Source: publisher figshare collection journal article supplement (https://tandf.figshare.com/articles/dataset/_/6585188)
Supplement: Supplementary file 1 [file 1 › idre_a_1473508_sm8329.pdf]

**Supplementary table S8: Meta-aggregation process for ‘synthesised finding’ 6** (5 findings which formed 3 categories).

| Findings<br>U = Unequivocal      C= Credible                                                                                                                                                                                                                                                                                                                                                                                                                                                                                           | Categories                                                                                                                                                                             | Synthesised Finding (SF)                                                                                                                                                                                                                                                          |
|----------------------------------------------------------------------------------------------------------------------------------------------------------------------------------------------------------------------------------------------------------------------------------------------------------------------------------------------------------------------------------------------------------------------------------------------------------------------------------------------------------------------------------------|----------------------------------------------------------------------------------------------------------------------------------------------------------------------------------------|-----------------------------------------------------------------------------------------------------------------------------------------------------------------------------------------------------------------------------------------------------------------------------------|
| <p><i>Balancing the service and support equation: use of informal sources of support during transition. Types of support provided by families and/or friends included assistance with personal activities of daily living, household management, parenting responsibilities, financial management, transportation, organisation of formal support services and rehabilitation services, and community and social activities</i> ABI [132] <b>U</b></p> <p><i>Family involvement important for encouragement</i> TBI [102] <b>U</b></p> | <p><b>Informal support from family and friends fulfilled physical, emotional, administrative roles for people living with a long term neurological condition in the community.</b></p> | <p><b>SF6: People with ABI and MS value informal support (physical, emotional, administrative) from family and friends, and perceive that the role of informal support could be maximized with appropriate assistance from Community rehabilitation and support services.</b></p> |
| <p><i>Day Care services reducing burden on carer.</i> MS [104] <b>U</b></p> <p><i>Family support services needed to provide counselling and assist with the emotional challenges associated with this transition.</i> ABI [111] <b>U</b></p>                                                                                                                                                                                                                                                                                           | <p><b>A perceived need for family support services to assist with challenges, provide support and help maximize the role of informal carers.</b></p>                                   |                                                                                                                                                                                                                                                                                   |
| <p><i>A need for maximizing and co-opting support and relationships – particularly with family and friends. This relates to assist patients in maintaining support to stay close to family and enhance attitudes of family members.</i>ABI [90] <b>U</b></p>                                                                                                                                                                                                                                                                           |                                                                                                                                                                                        |                                                                                                                                                                                                                                                                                   |
