# Supplementary material
Source: publisher figshare collection journal article supplement (https://tandf.figshare.com/articles/dataset/_/6585188)
Supplement: Supplementary file 8 [file 2]

## Fwd: Copyright query

Hamilton, Sharon

Mon 24/07/2017 23:54

To: Jackson, Katherine <K.Jackson@tees.ac.uk>;

Begin forwarded message:

**From:** Edoardo Aromataris <[ed.aromataris@adelaide.edu.au](mailto:ed.aromataris@adelaide.edu.au)>

**Date:** 24 July 2017 at 23:38:03 BST

**To:** "Hamilton, Sharon ([Sharon.Hamilton@tees.ac.uk](mailto:Sharon.Hamilton@tees.ac.uk))" <[Sharon.Hamilton@tees.ac.uk](mailto:Sharon.Hamilton@tees.ac.uk)>

**Cc:** Pam Fletcher <[pam.fletcher@adelaide.edu.au](mailto:pam.fletcher@adelaide.edu.au)>

**Subject:** Copyright query

Dear Prof. Hamilton,

Thank you for your query re use of the JBI QARI appraisal tool. You have the permission of the Joanna Briggs Institute to reproduce this tool in your manuscript and for the publisher/journal to reproduce it in this instance.

Please ensure that the content is appropriately cited to its source.

With best regards,  
Edoardo

--

Assoc Prof Edoardo Aromataris PhD  
Director, Synthesis Science

The Joanna Briggs Institute  
Faculty of Health and Medical Sciences  
The University of Adelaide, AUSTRALIA 5005  
Ph : +61 8 8313 0124  
e-mail: [ed.aromataris@adelaide.edu.au](mailto:ed.aromataris@adelaide.edu.au)

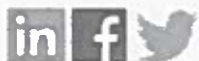

CRICOS Provider Number 00123M

-----  
This email message is intended only for the addressee(s) and contains information which may be confidential and/or copyright. If you are not the intended recipient please do not read, save, forward, disclose, or copy the contents of this email. If this email has been sent to you in error, please notify the sender by reply email and delete this email and any copies or links to this email completely and

immediately from your system. No representation is made that this email is free of viruses. Virus scanning is recommended and is the responsibility of the recipient.
